# Supplementary material for: Chronic Myelogenous Leukemia– Initiating Cells Require Polycomb Group Protein EZH2
Source: Oxford University Press journal article supplement (doi:10.1158/2159-8290.cd-15-1439), 2016-09-14
Supplement: 21598290cd151439-sup-159186_2_supp_3633726_vc62pv.xlsx [file 21598290cd151439-sup-159186_2_supp_3633726_vc62pv.xlsx]

## Sheet: P<0.014-fold cutoff up
Eed KO vs WT HSC enriched in KO	Ezh2 KO vs WT HSC enriched in KO	Ezh2 KO vs Con CML LIC enriched in KO
CHICAS_RB1_TARGETS_CONFLUENT	ALTEMEIER_RESPONSE_TO_LPS_WITH_MECHANICAL_VENTILATION	GENTILE_UV_HIGH_DOSE_UP
GSE22886_NAIVE_BCELL_VS_BM_PLASMA_CELL_DN	BENNETT_SYSTEMIC_LUPUS_ERYTHEMATOSUS	LEE_LIVER_CANCER_DENA_UP
GSE339_EX_VIVO_VS_IN_CULTURE_CD4POS_DC_DN	BOSCO_INTERFERON_INDUCED_ANTIVIRAL_MODULE	NIELSEN_LEIOMYOSARCOMA_CNN1_DN
HOFFMANN_LARGE_TO_SMALL_PRE_BII_LYMPHOCYTE_DN	BROWNE_INTERFERON_RESPONSIVE_GENES	REACTOME_ACTIVATION_OF_BH3_ONLY_PROTEINS
GSE17974_CTRL_VS_ACT_IL4_AND_ANTI_IL12_0.5H_CD4_TCELL_DN	DAUER_STAT3_TARGETS_DN	WEI_MIR34A_TARGETS
JOSEPH_RESPONSE_TO_SODIUM_BUTYRATE_UP	EINAV_INTERFERON_SIGNATURE_IN_CANCER	GSE14769_UNSTIM_VS_80MIN_LPS_BMDM_DN
SAKAI_CHRONIC_HEPATITIS_VS_LIVER_CANCER_UP	GSE13484_UNSTIM_VS_YF17D_VACCINE_STIM_PBMC_DN	RELA_DN.V1_UP
VILIMAS_NOTCH1_TARGETS_UP	GSE13485_DAY1_VS_DAY7_YF17D_VACCINE_PBMC_DN	VERRECCHIA_EARLY_RESPONSE_TO_TGFB1
GROSS_HYPOXIA_VIA_ELK3_AND_HIF1A_UP	GSE13485_DAY3_VS_DAY7_YF17D_VACCINE_PBMC_DN	GSE6269_STREP_AUREUS_VS_STREP_PNEUMO_INF_PBMC_DN
SMID_BREAST_CANCER_LUMINAL_B_DN	GSE13485_PRE_VS_POST_YF17D_VACCINATION_PBMC_DN	RPS14_DN.V1_UP
BURTON_ADIPOGENESIS_4	GSE14000_UNSTIM_VS_4H_LPS_DC_DN	LANDIS_ERBB2_BREAST_TUMORS_324_UP
GSE17974_CTRL_VS_ACT_IL4_AND_ANTI_IL12_4H_CD4_TCELL_DN	GSE14000_UNSTIM_VS_4H_LPS_DC_TRANSLATED_RNA_DN	MODULE_12
HUANG_GATA2_TARGETS_DN	GSE1432_CTRL_VS_IFNG_24H_MICROGLIA_DN	KRAS.KIDNEY_UP.V1_UP
DANG_MYC_TARGETS_DN	GSE18791_CTRL_VS_NEWCASTLE_VIRUS_DC_10H_DN	HOELZEL_NF1_TARGETS_UP
DAWSON_METHYLATED_IN_LYMPHOMA_TCL1	GSE18791_CTRL_VS_NEWCASTLE_VIRUS_DC_8H_DN	MCCLUNG_CREB1_TARGETS_DN
SANA_RESPONSE_TO_IFNG_DN	GSE18791_UNSTIM_VS_NEWCATSLE_VIRUS_DC_10H_DN	ALCALAY_AML_BY_NPM1_LOCALIZATION_UP
LIAN_LIPA_TARGETS_3M	GSE18791_UNSTIM_VS_NEWCATSLE_VIRUS_DC_18H_DN	RODRIGUES_DCC_TARGETS_DN
MODULE_573	GSE18791_UNSTIM_VS_NEWCATSLE_VIRUS_DC_6H_DN	SAFFORD_T_LYMPHOCYTE_ANERGY
SCHLOSSER_MYC_TARGETS_REPRESSED_BY_SERUM	GSE2706_R848_VS_R848_AND_LPS_2H_STIM_DC_DN	GSE22886_NAIVE_CD4_TCELL_VS_MONOCYTE_UP
HUMMEL_BURKITTS_LYMPHOMA_UP	GSE34205_HEALTHY_VS_FLU_INF_INFANT_PBMC_DN	SMID_BREAST_CANCER_NORMAL_LIKE_UP
PODAR_RESPONSE_TO_ADAPHOSTIN_UP	HECKER_IFNB1_TARGETS	STK33_SKM_DN
STAMBOLSKY_RESPONSE_TO_VITAMIN_D3_UP	ICHIBA_GRAFT_VERSUS_HOST_DISEASE_D7_UP	BROCKE_APOPTOSIS_REVERSED_BY_IL6
MEL18_DN.V1_UP	KIM_LRRC3B_TARGETS	BHAT_ESR1_TARGETS_VIA_AKT1_DN
GSE29618_BCELL_VS_MONOCYTE_DN	LTE2_UP.V1_DN	WEINMANN_ADAPTATION_TO_HYPOXIA_DN
FERRANDO_T_ALL_WITH_MLL_ENL_FUSION_UP	MOSERLE_IFNA_RESPONSE	PID_BCR_5PATHWAY
MATSUDA_NATURAL_KILLER_DIFFERENTIATION	RADAEVA_RESPONSE_TO_IFNA1_UP	BIOCARTA_CELLCYCLE_PATHWAY
GSE17974_CTRL_VS_ACT_IL4_AND_ANTI_IL12_2H_CD4_TCELL_DN	REACTOME_INTERFERON_GAMMA_SIGNALING	BAELDE_DIABETIC_NEPHROPATHY_DN
PROVENZANI_METASTASIS_UP	TAKEDA_TARGETS_OF_NUP98_HOXA9_FUSION_3D_UP	ALONSO_METASTASIS_EMT_UP
TIAN_TNF_SIGNALING_NOT_VIA_NFKB	WUNDER_INFLAMMATORY_RESPONSE_AND_CHOLESTEROL_UP	REACTOME_PRE_NOTCH_EXPRESSION_AND_PROCESSING
ONO_FOXP3_TARGETS_UP	ZHAN_MULTIPLE_MYELOMA_LB_DN	ADDYA_ERYTHROID_DIFFERENTIATION_BY_HEMIN
AZARE_NEOPLASTIC_TRANSFORMATION_BY_STAT3_DN	ZHANG_INTERFERON_RESPONSE	ZHAN_MULTIPLE_MYELOMA_CD2_UP
CRX_DN.V1_DN		GNF2_RTN1
GNF2_MMP1		GSE1460_INTRATHYMIC_T_PROGENITOR_VS_THYMIC_STROMAL_CELL_DN
CAMP_UP.V1_DN		REACTOME_MYOGENESIS
LANDIS_BREAST_CANCER_PROGRESSION_DN		GSE22886_CD4_TCELL_VS_BCELL_NAIVE_DN
JAATINEN_HEMATOPOIETIC_STEM_CELL_DN		TBK1.DF_DN
RASHI_NFKB1_TARGETS		HUANG_FOXA2_TARGETS_UP
LINDSTEDT_DENDRITIC_CELL_MATURATION_C		LU_IL4_SIGNALING
GSE39820_IL1B_IL6_VS_IL1B_IL6_IL23A_TREATED_CD4_TCELL_UP		TIAN_TNF_SIGNALING_VIA_NFKB
LIN_MELANOMA_COPY_NUMBER_DN		HAHTOLA_MYCOSIS_FUNGOIDES_CD4_UP
MODULE_299		GSE17974_CTRL_VS_ACT_IL4_AND_ANTI_IL12_6H_CD4_TCELL_UP
TSAI_RESPONSE_TO_RADIATION_THERAPY		BOQUEST_STEM_CELL_DN
VERRECCHIA_DELAYED_RESPONSE_TO_TGFB1		MODULE_19
GSE24102_GRANULOCYSTIC_MDSC_VS_NEUTROPHIL_DN		PID_PI3KPLCTRKPATHWAY
SENESE_HDAC1_TARGETS_UP		MEK_UP.V1_UP
RODWELL_AGING_KIDNEY_NO_BLOOD_UP		GSE39820_CTRL_VS_TGFBETA1_IL6_IL23A_CD4_TCELL_UP
REACTOME_MAPK_TARGETS_NUCLEAR_EVENTS_MEDIATED_BY_MAP_KINASES		BOYLAN_MULTIPLE_MYELOMA_PCA3_DN
HOQUE_METHYLATED_IN_CANCER		MODULE_137
GSE24142_DN2_VS_DN3_THYMOCYTE_DN		CHIBA_RESPONSE_TO_TSA
GAURNIER_PSMD4_TARGETS		HAHTOLA_MYCOSIS_FUNGOIDES_SKIN_UP
COLDREN_GEFITINIB_RESISTANCE_DN		BOYLAN_MULTIPLE_MYELOMA_PCA3_UP
ZHU_CMV_24_HR_UP		GSE24142_EARLY_THYMIC_PROGENITOR_VS_DN3_THYMOCYTE_UP
SA_MMP_CYTOKINE_CONNECTION		MOROSETTI_FACIOSCAPULOHUMERAL_MUSCULAR_DISTROPHY_UP
MONNIER_POSTRADIATION_TUMOR_ESCAPE_UP		GNF2_IGFBP1
PID_TAP63PATHWAY		BIOCARTA_CCR5_PATHWAY
GSE10325_MYELOID_VS_LUPUS_MYELOID_DN		PID_NFAT_3PATHWAY
LUI_THYROID_CANCER_CLUSTER_2		GSE24081_CONTROLLER_VS_PROGRESSOR_HIV_SPECIFIC_CD8_TCELL_UP
KOKKINAKIS_METHIONINE_DEPRIVATION_96HR_UP		WARTERS_RESPONSE_TO_IR_SKIN
MYC_UP.V1_UP		HU_ANGIOGENESIS_UP
NAKAMURA_TUMOR_ZONE_PERIPHERAL_VS_CENTRAL_DN		DUTERTRE_ESTRADIOL_RESPONSE_6HR_DN
BOSCO_INTERFERON_INDUCED_ANTIVIRAL_MODULE		BIOCARTA_CTCF_PATHWAY
LIU_PROSTATE_CANCER_DN		MISHRA_CARCINOMA_ASSOCIATED_FIBROBLAST_UP
BOYLAN_MULTIPLE_MYELOMA_C_DN		CREIGHTON_ENDOCRINE_THERAPY_RESISTANCE_5
REACTOME_DOWNSTREAM_SIGNALING_EVENTS_OF_B_CELL_RECEPTOR_BCR		VERRECCHIA_RESPONSE_TO_TGFB1_C5
KORKOLA_CORRELATED_WITH_POU5F1		YAMAZAKI_TCEB3_TARGETS_UP
AMIT_EGF_RESPONSE_480_HELA		TSENG_IRS1_TARGETS_DN
IL2_UP.V1_UP		PID_P53DOWNSTREAMPATHWAY
WUNDER_INFLAMMATORY_RESPONSE_AND_CHOLESTEROL_UP		BRACHAT_RESPONSE_TO_CAMPTOTHECIN_UP
GSE17721_CTRL_VS_PAM3CSK4_12H_BMDM_DN		GENTILE_UV_HIGH_DOSE_DN
QI_PLASMACYTOMA_DN		ONKEN_UVEAL_MELANOMA_DN
GSE360_L_DONOVANI_VS_B_MALAYI_HIGH_DOSE_MAC_UP		CHYLA_CBFA2T3_TARGETS_UP
IZADPANAH_STEM_CELL_ADIPOSE_VS_BONE_DN		GSE22886_IGM_MEMORY_BCELL_VS_BLOOD_PLASMA_CELL_UP
GRABARCZYK_BCL11B_TARGETS_UP		MIYAGAWA_TARGETS_OF_EWSR1_ETS_FUSIONS_DN
ONDER_CDH1_SIGNALING_VIA_CTNNB1		CHICAS_RB1_TARGETS_CONFLUENT
HAN_JNK_SINGALING_UP		GSE7852_LN_VS_THYMUS_TREG_DN
IVANOVA_HEMATOPOIESIS_INTERMEDIATE_PROGENITOR		KOBAYASHI_EGFR_SIGNALING_6HR_DN
ELVIDGE_HIF1A_AND_HIF2A_TARGETS_DN		GAVIN_FOXP3_TARGETS_CLUSTER_P3
MASSARWEH_TAMOXIFEN_RESISTANCE_DN		MODULE_2
WALLACE_PROSTATE_CANCER_RACE_UP		DACOSTA_UV_RESPONSE_VIA_ERCC3_COMMON_DN
ZHONG_SECRETOME_OF_LUNG_CANCER_AND_ENDOTHELIUM		IGLESIAS_E2F_TARGETS_UP
TGFB_UP.V1_UP		BASSO_CD40_SIGNALING_DN
SCHRAETS_MLL_TARGETS_UP		GSE29618_PDC_VS_MDC_DAY7_FLU_VACCINE_UP
GERHOLD_ADIPOGENESIS_DN		KEGG_P53_SIGNALING_PATHWAY
GAJATE_RESPONSE_TO_TRABECTEDIN_UP		GSE1460_CD4_THYMOCYTE_VS_THYMIC_STROMAL_CELL_DN
REACTOME_SIGNALING_BY_HIPPO		GSE3982_BCELL_VS_BASOPHIL_DN
LEF1_UP.V1_UP		BILD_HRAS_ONCOGENIC_SIGNATURE
MARKEY_RB1_ACUTE_LOF_UP		ONDER_CDH1_TARGETS_2_DN
MODULE_83		PID_EPHRINBREVPATHWAY
HOELZEL_NF1_TARGETS_UP		CASORELLI_APL_SECONDARY_VS_DE_NOVO_UP
SEMENZA_HIF1_TARGETS		CORRE_MULTIPLE_MYELOMA_DN
AMIT_EGF_RESPONSE_240_HELA		CHIANG_LIVER_CANCER_SUBCLASS_INTERFERON_DN
REACTOME_P53_INDEPENDENT_G1_S_DNA_DAMAGE_CHECKPOINT		BOYLAN_MULTIPLE_MYELOMA_C_D_UP
VERHAAK_AML_WITH_NPM1_MUTATED_UP		ENGELMANN_CANCER_PROGENITORS_DN
MODULE_456		LIEN_BREAST_CARCINOMA_METAPLASTIC
GSE2706_UNSTIM_VS_2H_LPS_AND_R848_DC_DN		PID_EPHA2_FWDPATHWAY
RAMALHO_STEMNESS_UP		PLASARI_TGFB1_SIGNALING_VIA_NFIC_10HR_UP
AMIT_SERUM_RESPONSE_240_MCF10A		PLASARI_TGFB1_TARGETS_1HR_UP
GSE7460_TCONV_VS_TREG_LN_DN		STEGER_ADIPOGENESIS_DN
CUI_GLUCOSE_DEPRIVATION		GSE10325_LUPUS_CD4_TCELL_VS_LUPUS_BCELL_DN
PEDERSEN_METASTASIS_BY_ERBB2_ISOFORM_4		WANG_METHYLATED_IN_BREAST_CANCER
TOOKER_GEMCITABINE_RESISTANCE_DN		VECCHI_GASTRIC_CANCER_ADVANCED_VS_EARLY_UP
SARRIO_EPITHELIAL_MESENCHYMAL_TRANSITION_DN		RICKMAN_HEAD_AND_NECK_CANCER_F
OHM_METHYLATED_IN_ADULT_CANCERS		IKEDA_MIR30_TARGETS_UP
GENTILE_UV_HIGH_DOSE_UP		AMIT_EGF_RESPONSE_120_HELA
SCHOEN_NFKB_SIGNALING		ODONNELL_TARGETS_OF_MYC_AND_TFRC_UP
SATO_SILENCED_EPIGENETICALLY_IN_PANCREATIC_CANCER		REACTOME_PRE_NOTCH_TRANSCRIPTION_AND_TRANSLATION
GSE2706_R848_VS_R848_AND_LPS_2H_STIM_DC_DN		AMIT_DELAYED_EARLY_GENES
REACTOME_HS_GAG_BIOSYNTHESIS		MEL18_DN.V1_DN
MCCLUNG_DELTA_FOSB_TARGETS_2WK		GSE9988_LPS_VS_CTRL_TREATED_MONOCYTE_UP
GNF2_MCL1		PID_BMPPATHWAY
LOPES_METHYLATED_IN_COLON_CANCER_UP		CHIANG_LIVER_CANCER_SUBCLASS_UNANNOTATED_UP
GSE17721_0.5H_VS_24H_CPG_BMDM_DN		RASHI_RESPONSE_TO_IONIZING_RADIATION_2
BOYLAN_MULTIPLE_MYELOMA_C_D_DN		FERRANDO_T_ALL_WITH_MLL_ENL_FUSION_UP
GSE18791_CTRL_VS_NEWCASTLE_VIRUS_DC_6H_DN		SATO_SILENCED_EPIGENETICALLY_IN_PANCREATIC_CANCER
GAZDA_DIAMOND_BLACKFAN_ANEMIA_MYELOID_UP		GSE9037_WT_VS_IRAK4_KO_BMDM_UP
MODULE_139		MANALO_HYPOXIA_UP
AMUNDSON_POOR_SURVIVAL_AFTER_GAMMA_RADIATION_8G		WIERENGA_STAT5A_TARGETS_GROUP2
GSE24142_ADULT_VS_FETAL_DN3_THYMOCYTE_DN		WEINMANN_ADAPTATION_TO_HYPOXIA_UP
LINDGREN_BLADDER_CANCER_CLUSTER_2B		SWEET_KRAS_TARGETS_UP
ZHONG_RESPONSE_TO_AZACITIDINE_AND_TSA_UP		GSE22886_TH1_VS_TH2_48H_ACT_UP
KEGG_TGF_BETA_SIGNALING_PATHWAY		GSE24142_EARLY_THYMIC_PROGENITOR_VS_DN2_THYMOCYTE_FETAL_UP
GAVIN_FOXP3_TARGETS_CLUSTER_P3		MODULE_1
GSE339_CD8POS_VS_CD4CD8DN_DC_UP		CROONQUIST_NRAS_VS_STROMAL_STIMULATION_DN
SERVITJA_ISLET_HNF1A_TARGETS_UP		SCHAEFFER_PROSTATE_DEVELOPMENT_6HR_DN
MODULE_488		SCHAEFFER_PROSTATE_DEVELOPMENT_12HR_UP
JECHLINGER_EPITHELIAL_TO_MESENCHYMAL_TRANSITION_DN		KASLER_HDAC7_TARGETS_2_DN
TAKEDA_TARGETS_OF_NUP98_HOXA9_FUSION_10D_UP		VALK_AML_CLUSTER_10
GSE339_CD4POS_VS_CD8POS_DC_IN_CULTURE_UP		NAGASHIMA_NRG1_SIGNALING_UP
SHIPP_DLBCL_VS_FOLLICULAR_LYMPHOMA_UP		IKEDA_MIR30_TARGETS_DN
HONMA_DOCETAXEL_RESISTANCE		PASQUALUCCI_LYMPHOMA_BY_GC_STAGE_DN
FULCHER_INFLAMMATORY_RESPONSE_LECTIN_VS_LPS_UP		PRC2_EZH2_UP.V1_DN
BACOLOD_RESISTANCE_TO_ALKYLATING_AGENTS_UP		LI_CISPLATIN_RESISTANCE_UP
ESC_V6.5_UP_LATE.V1_UP		BREDEMEYER_RAG_SIGNALING_VIA_ATM_NOT_VIA_NFKB_UP
GSE9988_ANTI_TREM1_VS_LPS_MONOCYTE_DN		GSE10325_CD4_TCELL_VS_BCELL_DN
SATO_SILENCED_BY_METHYLATION_IN_PANCREATIC_CANCER_1		SNF5_DN.V1_DN
AMIT_EGF_RESPONSE_240_MCF10A		BOYLAN_MULTIPLE_MYELOMA_D_CLUSTER_UP
HELLEBREKERS_SILENCED_DURING_TUMOR_ANGIOGENESIS		PICCALUGA_ANGIOIMMUNOBLASTIC_LYMPHOMA_UP
GSE17721_CTRL_VS_PAM3CSK4_6H_BMDM_DN		WEST_ADRENOCORTICAL_TUMOR_MARKERS_DN
CHIANG_LIVER_CANCER_SUBCLASS_CTNNB1_DN		FONTAINE_THYROID_TUMOR_UNCERTAIN_MALIGNANCY_UP
PLASARI_TGFB1_SIGNALING_VIA_NFIC_10HR_UP		GSE24142_EARLY_THYMIC_PROGENITOR_VS_DN3_THYMOCYTE_ADULT_UP
VECCHI_GASTRIC_CANCER_ADVANCED_VS_EARLY_UP		CHIARADONNA_NEOPLASTIC_TRANSFORMATION_CDC25_UP
GRUETZMANN_PANCREATIC_CANCER_UP		SHETH_LIVER_CANCER_VS_TXNIP_LOSS_PAM2
MODULE_46		GSE29618_BCELL_VS_PDC_DAY7_FLU_VACCINE_UP
SCHAEFFER_SOX9_TARGETS_IN_PROSTATE_DEVELOPMENT_UP		CASORELLI_ACUTE_PROMYELOCYTIC_LEUKEMIA_UP
GSE1432_CTRL_VS_IFNG_24H_MICROGLIA_DN		GSE29617_CTRL_VS_DAY7_TIV_FLU_VACCINE_PBMC_2008_UP
JIANG_HYPOXIA_NORMAL		NUYTTEN_NIPP1_TARGETS_UP
SIMBULAN_PARP1_TARGETS_UP		ZHANG_TLX_TARGETS_36HR_UP
AFFAR_YY1_TARGETS_UP		YU_MYC_TARGETS_DN
LIEN_BREAST_CARCINOMA_METAPLASTIC		BILBAN_B_CLL_LPL_UP
DIAZ_CHRONIC_MEYLOGENOUS_LEUKEMIA_DN		REACTOME_A_TETRASACCHARIDE_LINKER_SEQUENCE_IS_REQUIRED_FOR_GAG_SYNTHESIS
MODULE_12		AMIT_EGF_RESPONSE_40_HELA
PID_MYC_REPRESSPATHWAY		IVANOVA_HEMATOPOIESIS_STEM_CELL
HESS_TARGETS_OF_HOXA9_AND_MEIS1_UP		OSWALD_HEMATOPOIETIC_STEM_CELL_IN_COLLAGEN_GEL_UP
REACTOME_CYCLIN_E_ASSOCIATED_EVENTS_DURING_G1_S_TRANSITION_		GSE9988_LOW_LPS_VS_VEHICLE_TREATED_MONOCYTE_UP
JOHANSSON_GLIOMAGENESIS_BY_PDGFB_UP		GSE24142_EARLY_THYMIC_PROGENITOR_VS_DN2_THYMOCYTE_UP
KAECH_DAY15_EFF_VS_MEMORY_CD8_TCELL_DN		GSE2706_UNSTIM_VS_2H_R848_DC_DN
GSE36476_CTRL_VS_TSST_ACT_16H_MEMORY_CD4_TCELL_YOUNG_DN		KERLEY_RESPONSE_TO_CISPLATIN_UP
ZHENG_IL22_SIGNALING_UP		OXFORD_RALA_OR_RALB_TARGETS_DN
GSE32423_MEMORY_VS_NAIVE_CD8_TCELL_UP		BOQUEST_STEM_CELL_UP
MODULE_321		TIAN_TNF_SIGNALING_NOT_VIA_NFKB
GSE16755_CTRL_VS_IFNA_TREATED_MAC_DN		DAIRKEE_TERT_TARGETS_DN
GSE17580_UNINFECTED_VS_S_MANSONI_INF_TEFF_DN		HE_PTEN_TARGETS_UP
GSE360_LOW_DOSE_B_MALAYI_VS_M_TUBERCULOSIS_DC_DN		GSE9988_LOW_LPS_VS_CTRL_TREATED_MONOCYTE_UP
STEIN_ESTROGEN_RESPONSE_NOT_VIA_ESRRA		WESTON_VEGFA_TARGETS_12HR
KUROZUMI_RESPONSE_TO_ONCOCYTIC_VIRUS		GROSS_HYPOXIA_VIA_ELK3_AND_HIF1A_UP
WAMUNYOKOLI_OVARIAN_CANCER_LMP_UP		ENK_UV_RESPONSE_EPIDERMIS_DN
YAMAZAKI_TCEB3_TARGETS_DN		GNF2_CDH11
JEON_SMAD6_TARGETS_UP		PLASARI_TGFB1_SIGNALING_VIA_NFIC_1HR_UP
SMID_BREAST_CANCER_BASAL_UP		BHAT_ESR1_TARGETS_NOT_VIA_AKT1_DN
HOUSTIS_ROS		INGRAM_SHH_TARGETS_UP
ENK_UV_RESPONSE_EPIDERMIS_DN		CHESLER_BRAIN_HIGHEST_EXPRESSION
PID_TGFBRPATHWAY		GSE24142_DN2_VS_DN3_THYMOCYTE_DN
GSE9988_ANTI_TREM1_VS_LOW_LPS_MONOCYTE_DN		VERRECCHIA_RESPONSE_TO_TGFB1_C1
MCBRYAN_PUBERTAL_BREAST_3_4WK_UP		GARGALOVIC_RESPONSE_TO_OXIDIZED_PHOSPHOLIPIDS_TURQUOISE_UP
BRUINS_UVC_RESPONSE_VIA_TP53_GROUP_B		RODRIGUES_NTN1_AND_DCC_TARGETS
LAU_APOPTOSIS_CDKN2A_UP		GSE7460_TREG_VS_TCONV_ACT_UP
MODULE_121		GSE13306_RA_VS_UNTREATED_MEM_CD4_TCELL_DN
LABBE_TGFB1_TARGETS_UP		GSE22886_NAIVE_CD8_TCELL_VS_MONOCYTE_UP
MODULE_47		ZHENG_GLIOBLASTOMA_PLASTICITY_UP
RICKMAN_TUMOR_DIFFERENTIATED_WELL_VS_POORLY_DN		WANG_SMARCE1_TARGETS_UP
SCHLINGEMANN_SKIN_CARCINOGENESIS_TPA_UP		PLASARI_TGFB1_TARGETS_10HR_DN
REACTOME_TCA_CYCLE_AND_RESPIRATORY_ELECTRON_TRANSPORT		NAKAMURA_ADIPOGENESIS_LATE_UP
DAZARD_RESPONSE_TO_UV_SCC_UP		MULLIGHAN_MLL_SIGNATURE_2_DN
GSE9037_WT_VS_IRAK4_KO_BMDM_UP		PETROVA_ENDOTHELIUM_LYMPHATIC_VS_BLOOD_DN
AMIT_EGF_RESPONSE_60_MCF10A		BONCI_TARGETS_OF_MIR15A_AND_MIR16_1
REACTOME_MITOCHONDRIAL_PROTEIN_IMPORT		PANGAS_TUMOR_SUPPRESSION_BY_SMAD1_AND_SMAD5_UP
MOREIRA_RESPONSE_TO_TSA_UP		LANDIS_BREAST_CANCER_PROGRESSION_DN
MARZEC_IL2_SIGNALING_UP		GSE22886_TCELL_VS_BCELL_NAIVE_DN
PID_ATF2_PATHWAY		GSE9988_LPS_VS_VEHICLE_TREATED_MONOCYTE_UP
SENESE_HDAC3_TARGETS_UP		HOFMANN_CELL_LYMPHOMA_UP
GAUSSMANN_MLL_AF4_FUSION_TARGETS_F_DN		GSE29618_BCELL_VS_MDC_UP
GSE17721_POLYIC_VS_CPG_24H_BMDM_DN		GSE17721_LPS_VS_PAM3CSK4_2H_BMDM_UP
GSE7852_THYMUS_VS_FAT_TREG_DN		GSE32423_MEMORY_VS_NAIVE_CD8_TCELL_UP
SMIRNOV_CIRCULATING_ENDOTHELIOCYTES_IN_CANCER_UP		AMIT_SERUM_RESPONSE_60_MCF10A
CREIGHTON_ENDOCRINE_THERAPY_RESISTANCE_4		JEPSEN_SMRT_TARGETS
REACTOME_CDT1_ASSOCIATION_WITH_THE_CDC6_ORC_ORIGIN_COMPLEX		VECCHI_GASTRIC_CANCER_EARLY_DN
GSE30962_ACUTE_VS_CHRONIC_LCMV_PRIMARY_INF_CD8_TCELL_DN		LINDGREN_BLADDER_CANCER_CLUSTER_2A_DN
SCHAEFFER_PROSTATE_DEVELOPMENT_12HR_UP		AMIT_EGF_RESPONSE_60_MCF10A
KIM_WT1_TARGETS_12HR_UP		KLEIN_PRIMARY_EFFUSION_LYMPHOMA_DN
CHEN_HOXA5_TARGETS_9HR_UP		HORIUCHI_WTAP_TARGETS_UP
BOUDOUKHA_BOUND_BY_IGF2BP2		TAKEDA_TARGETS_OF_NUP98_HOXA9_FUSION_10D_DN
GSE29618_BCELL_VS_PDC_UP		GSE17974_IL4_AND_ANTI_IL12_VS_UNTREATED_2H_ACT_CD4_TCELL_DN
PARK_TRETINOIN_RESPONSE_AND_PML_RARA_FUSION		BRIDEAU_IMPRINTED_GENES
GSE20366_TREG_VS_NAIVE_CD4_TCELL_UP		RODWELL_AGING_KIDNEY_NO_BLOOD_UP
RUTELLA_RESPONSE_TO_CSF2RB_AND_IL4_DN		WANG_IMMORTALIZED_BY_HOXA9_AND_MEIS1_DN
DANG_REGULATED_BY_MYC_DN		MATZUK_SPERMATOGONIA
SPIRA_SMOKERS_LUNG_CANCER_UP		MULLIGHAN_MLL_SIGNATURE_1_DN
SESTO_RESPONSE_TO_UV_C3		GSE10325_BCELL_VS_MYELOID_UP
ODONNELL_TARGETS_OF_MYC_AND_TFRC_UP		ELVIDGE_HYPOXIA_BY_DMOG_UP
VART_KSHV_INFECTION_ANGIOGENIC_MARKERS_UP		GSE339_EX_VIVO_VS_IN_CULTURE_CD4POS_DC_DN
ROY_WOUND_BLOOD_VESSEL_UP		DAVICIONI_RHABDOMYOSARCOMA_PAX_FOXO1_FUSION_UP
REACTOME_APC_C_CDC20_MEDIATED_DEGRADATION_OF_MITOTIC_PROTEINS		MCCLUNG_DELTA_FOSB_TARGETS_2WK
KOKKINAKIS_METHIONINE_DEPRIVATION_48HR_UP		GAVIN_FOXP3_TARGETS_CLUSTER_P4
BURTON_ADIPOGENESIS_5		GSE17974_CTRL_VS_ACT_IL4_AND_ANTI_IL12_12H_CD4_TCELL_UP
GSE10325_BCELL_VS_LUPUS_BCELL_DN		RIGGINS_TAMOXIFEN_RESISTANCE_DN
REACTOME_REGULATION_OF_APOPTOSIS		SERVITJA_LIVER_HNF1A_TARGETS_UP
GSE18791_CTRL_VS_NEWCASTLE_VIRUS_DC_10H_DN		STK33_SKM_UP
MOOTHA_VOXPHOS		MASSARWEH_TAMOXIFEN_RESISTANCE_UP
P53_DN.V1_UP		BILBAN_B_CLL_LPL_DN
GAUSSMANN_MLL_AF4_FUSION_TARGETS_E_UP		MODULE_47
GSE2706_UNSTIM_VS_8H_LPS_AND_R848_DC_DN		RIGGI_EWING_SARCOMA_PROGENITOR_DN
VALK_AML_WITH_CEBPA		GSE24142_ADULT_VS_FETAL_DN2_THYMOCYTE_UP
HOWLIN_PUBERTAL_MAMMARY_GLAND		GOZGIT_ESR1_TARGETS_UP
GSE29618_PDC_VS_MDC_DAY7_FLU_VACCINE_DN		MCBRYAN_PUBERTAL_BREAST_4_5WK_UP
SCHUETZ_BREAST_CANCER_DUCTAL_INVASIVE_DN		DOANE_BREAST_CANCER_CLASSES_DN
SWEET_KRAS_TARGETS_UP		ODONNELL_TFRC_TARGETS_UP
BOQUEST_STEM_CELL_CULTURED_VS_FRESH_UP		CASTELLANO_NRAS_TARGETS_UP
YAO_TEMPORAL_RESPONSE_TO_PROGESTERONE_CLUSTER_6		GSE29618_BCELL_VS_MONOCYTE_DAY7_FLU_VACCINE_UP
STK33_SKM_DN		RODRIGUES_THYROID_CARCINOMA_ANAPLASTIC_DN
REACTOME_INTRINSIC_PATHWAY_FOR_APOPTOSIS		GSE24142_DN2_VS_DN3_THYMOCYTE_ADULT_DN
PIONTEK_PKD1_TARGETS_UP		ZWANG_CLASS_1_TRANSIENTLY_INDUCED_BY_EGF
ZWANG_CLASS_1_TRANSIENTLY_INDUCED_BY_EGF		SMID_BREAST_CANCER_BASAL_UP
PLASARI_NFIC_TARGETS_BASAL_UP		GSE22886_CD8_TCELL_VS_BCELL_NAIVE_DN
KIM_LRRC3B_TARGETS		LEE_RECENT_THYMIC_EMIGRANT
ROZANOV_MMP14_TARGETS_SUBSET		REACTOME_SIGNALING_BY_ROBO_RECEPTOR
GSE18791_UNSTIM_VS_NEWCATSLE_VIRUS_DC_18H_DN		BURTON_ADIPOGENESIS_7
BARRIER_CANCER_RELAPSE_NORMAL_SAMPLE_UP		TOMLINS_PROSTATE_CANCER_DN
GNF2_NS		YAO_HOXA10_TARGETS_VIA_PROGESTERONE_UP
GSE18791_UNSTIM_VS_NEWCATSLE_VIRUS_DC_10H_DN		GENTILE_UV_RESPONSE_CLUSTER_D6
GSE13484_12H_UNSTIM_VS_YF17D_VACCINE_STIM_PBMC_DN		GSE14769_UNSTIM_VS_120MIN_LPS_BMDM_DN
NUYTTEN_NIPP1_TARGETS_UP		GSE9037_CTRL_VS_LPS_1H_STIM_IRAK4_KO_BMDM_DN
GSE17974_0H_VS_4H_IN_VITRO_ACT_CD4_TCELL_DN		GSE1460_INTRATHYMIC_T_PROGENITOR_VS_CD4_THYMOCYTE_DN
MODULE_75		ELVIDGE_HYPOXIA_UP
KASLER_HDAC7_TARGETS_1_DN		DUTERTRE_ESTRADIOL_RESPONSE_24HR_DN
BIOCARTA_CHEMICAL_PATHWAY		LEE_NEURAL_CREST_STEM_CELL_DN
LIM_MAMMARY_STEM_CELL_UP		DOANE_BREAST_CANCER_ESR1_DN
SMIRNOV_RESPONSE_TO_IR_6HR_UP		GSE17974_0H_VS_12H_IN_VITRO_ACT_CD4_TCELL_UP
GSE3982_DC_VS_NKCELL_UP		KEGG_PRIMARY_IMMUNODEFICIENCY
GSE7460_WT_VS_FOXP3_HET_ACT_TCONV_DN		YAO_TEMPORAL_RESPONSE_TO_PROGESTERONE_CLUSTER_6
GSE9988_LPS_VS_CTRL_TREATED_MONOCYTE_UP		SMID_BREAST_CANCER_RELAPSE_IN_BONE_DN
MODULE_52		PHONG_TNF_RESPONSE_VIA_P38_PARTIAL
AMIT_EGF_RESPONSE_40_HELA		GSE24142_DN2_VS_DN3_THYMOCYTE_FETAL_DN
MODULE_62		STK33_UP
TAKEDA_TARGETS_OF_NUP98_HOXA9_FUSION_3D_DN		DELYS_THYROID_CANCER_DN
KEGG_PARKINSONS_DISEASE		MATSUDA_NATURAL_KILLER_DIFFERENTIATION
WANG_SMARCE1_TARGETS_DN		GSE20366_CD103_KLRG1_DP_VS_DN_TREG_DN
STK33_SKM_UP		LIU_PROSTATE_CANCER_DN
IGLESIAS_E2F_TARGETS_UP		WU_CELL_MIGRATION
TONKS_TARGETS_OF_RUNX1_RUNX1T1_FUSION_SUSTAINED_IN_MONOCYTE_UP		LIM_MAMMARY_STEM_CELL_UP
GENTILE_UV_HIGH_DOSE_DN		WAMUNYOKOLI_OVARIAN_CANCER_LMP_DN
MODULE_84		TURASHVILI_BREAST_LOBULAR_CARCINOMA_VS_DUCTAL_NORMAL_UP
HAHTOLA_MYCOSIS_FUNGOIDES_CD4_UP		HELLEBREKERS_SILENCED_DURING_TUMOR_ANGIOGENESIS
LANDIS_BREAST_CANCER_PROGRESSION_UP		ESC_J1_UP_LATE.V1_UP
ADDYA_ERYTHROID_DIFFERENTIATION_BY_HEMIN		BURTON_ADIPOGENESIS_9
JECHLINGER_EPITHELIAL_TO_MESENCHYMAL_TRANSITION_UP		GSE22886_NAIVE_BCELL_VS_NEUTROPHIL_UP
AMIT_EGF_RESPONSE_120_HELA		CHARAFE_BREAST_CANCER_LUMINAL_VS_BASAL_DN
GSE17721_12H_VS_24H_PAM3CSK4_BMDM_UP		GSE10325_LUPUS_BCELL_VS_LUPUS_MYELOID_UP
KERLEY_RESPONSE_TO_CISPLATIN_UP		TONKS_TARGETS_OF_RUNX1_RUNX1T1_FUSION_HSC_UP
GSE7852_TREG_VS_TCONV_FAT_UP		VALK_AML_CLUSTER_1
STK33_UP		VANDESLUIS_COMMD1_TARGETS_GROUP_3_DN
AMUNDSON_GENOTOXIC_SIGNATURE		STK33_NOMO_UP
BILBAN_B_CLL_LPL_UP		BECKER_TAMOXIFEN_RESISTANCE_DN
GSE13306_RA_VS_UNTREATED_MEM_CD4_TCELL_DN		CHEN_LVAD_SUPPORT_OF_FAILING_HEART_UP
GSE2706_2H_VS_8H_R848_AND_LPS_STIM_DC_DN		BOHN_PRIMARY_IMMUNODEFICIENCY_SYNDROM_DN
LI_PROSTATE_CANCER_EPIGENETIC		PASINI_SUZ12_TARGETS_DN
GSE2706_UNSTIM_VS_2H_LPS_DC_DN		CHIARADONNA_NEOPLASTIC_TRANSFORMATION_KRAS_CDC25_DN
LIANG_HEMATOPOIESIS_STEM_CELL_NUMBER_LARGE_VS_TINY_UP		REACTOME_SIGNALING_BY_BMP
GSE2706_R848_VS_R848_AND_LPS_8H_STIM_DC_DN		ZHAN_MULTIPLE_MYELOMA_MS_UP
ELVIDGE_HIF1A_TARGETS_UP		WANG_MLL_TARGETS
PID_AMB2_NEUTROPHILS_PATHWAY		KIM_WT1_TARGETS_UP
LUI_TARGETS_OF_PAX8_PPARG_FUSION		INGA_TP53_TARGETS
DELYS_THYROID_CANCER_UP		AMUNDSON_POOR_SURVIVAL_AFTER_GAMMA_RADIATION_8G
MODULE_180		GSE9988_ANTI_TREM1_VS_CTRL_TREATED_MONOCYTES_UP
CHARAFE_BREAST_CANCER_LUMINAL_VS_MESENCHYMAL_DN		BOQUEST_STEM_CELL_CULTURED_VS_FRESH_UP
GSE9988_LOW_LPS_VS_CTRL_TREATED_MONOCYTE_UP		GSE14769_UNSTIM_VS_60MIN_LPS_BMDM_DN
GSE20715_0H_VS_24H_OZONE_LUNG_DN		BRUECKNER_TARGETS_OF_MIRLET7A3_DN
GROSS_HYPOXIA_VIA_ELK3_ONLY_UP		ESC_V6.5_UP_LATE.V1_UP
HELLER_HDAC_TARGETS_SILENCED_BY_METHYLATION_DN		TSENG_ADIPOGENIC_POTENTIAL_DN
TONKS_TARGETS_OF_RUNX1_RUNX1T1_FUSION_MONOCYTE_UP		ONDER_CDH1_TARGETS_2_UP
MCCLUNG_CREB1_TARGETS_UP		MCBRYAN_PUBERTAL_BREAST_5_6WK_UP
WIERENGA_STAT5A_TARGETS_UP		CHANDRAN_METASTASIS_DN
GSE24634_IL4_VS_CTRL_TREATED_NAIVE_CD4_TCELL_DAY10_DN		ZHAN_MULTIPLE_MYELOMA_CD1_VS_CD2_DN
MODULE_44		SWEET_LUNG_CANCER_KRAS_DN
GSE30083_SP3_VS_SP4_THYMOCYTE_DN		AMIT_SERUM_RESPONSE_40_MCF10A
CERVERA_SDHB_TARGETS_2		GSE3982_DC_VS_BCELL_UP
WANG_METHYLATED_IN_BREAST_CANCER		DURAND_STROMA_MAX_UP
BILD_HRAS_ONCOGENIC_SIGNATURE		GSE32423_MEMORY_VS_NAIVE_CD8_TCELL_DN
CHUANG_OXIDATIVE_STRESS_RESPONSE_UP		LINDGREN_BLADDER_CANCER_CLUSTER_2B
WOOD_EBV_EBNA1_TARGETS_UP		CHARAFE_BREAST_CANCER_LUMINAL_VS_MESENCHYMAL_DN
GROSS_ELK3_TARGETS_DN		GSE24142_EARLY_THYMIC_PROGENITOR_VS_DN2_THYMOCYTE_ADULT_UP
GSE18791_CTRL_VS_NEWCASTLE_VIRUS_DC_2H_DN		RAF_UP.V1_UP
GSE1460_NAIVE_CD4_TCELL_ADULT_BLOOD_VS_THYMIC_STROMAL_CELL_DN		TORCHIA_TARGETS_OF_EWSR1_FLI1_FUSION_DN
GENTILE_UV_RESPONSE_CLUSTER_D7		SCHUETZ_BREAST_CANCER_DUCTAL_INVASIVE_UP
GSE2706_UNSTIM_VS_2H_R848_DC_DN		SUNG_METASTASIS_STROMA_UP
AMIT_SERUM_RESPONSE_60_MCF10A		MARTORIATI_MDM4_TARGETS_FETAL_LIVER_UP
GSE22886_DAY0_VS_DAY1_MONOCYTE_IN_CULTURE_DN		MCBRYAN_PUBERTAL_TGFB1_TARGETS_UP
MISSIAGLIA_REGULATED_BY_METHYLATION_UP		WINZEN_DEGRADED_VIA_KHSRP
MODULE_170		GSE29618_BCELL_VS_PDC_UP
WEINMANN_ADAPTATION_TO_HYPOXIA_DN		SIMBULAN_PARP1_TARGETS_UP
GSE17974_IL4_AND_ANTI_IL12_VS_UNTREATED_72H_ACT_CD4_TCELL_DN		GESERICK_TERT_TARGETS_DN
ROZANOV_MMP14_TARGETS_UP		GSE29618_BCELL_VS_MDC_DAY7_FLU_VACCINE_UP
GSE15930_STIM_VS_STIM_AND_IL-12_48H_CD8_T_CELL_DN		GSE39820_CTRL_VS_IL1B_IL6_CD4_TCELL_DN
BOSCO_EPITHELIAL_DIFFERENTIATION_MODULE		VERHAAK_AML_WITH_NPM1_MUTATED_DN
NAGASHIMA_NRG1_SIGNALING_UP		SENESE_HDAC3_TARGETS_UP
MODULE_79		UZONYI_RESPONSE_TO_LEUKOTRIENE_AND_THROMBIN
PEDERSEN_TARGETS_OF_611CTF_ISOFORM_OF_ERBB2		GSE6269_E_COLI_VS_STREP_AUREUS_INF_PBMC_UP
PROVENZANI_METASTASIS_DN		GSE9988_ANTI_TREM1_AND_LPS_VS_CTRL_TREATED_MONOCYTES_UP
REACTOME_SCFSKP2_MEDIATED_DEGRADATION_OF_P27_P21		PLASARI_TGFB1_SIGNALING_VIA_NFIC_1HR_DN
SMITH_TERT_TARGETS_UP		SHETH_LIVER_CANCER_VS_TXNIP_LOSS_PAM3
GSE20366_TREG_VS_NAIVE_CD4_TCELL_HOMEOSTATIC_CONVERSION_UP		SCHRAETS_MLL_TARGETS_UP
MEK_UP.V1_UP		KUMAR_TARGETS_OF_MLL_AF9_FUSION
KIM_RESPONSE_TO_TSA_AND_DECITABINE_UP		JAATINEN_HEMATOPOIETIC_STEM_CELL_UP
ONGUSAHA_TP53_TARGETS		SMID_BREAST_CANCER_LUMINAL_B_DN
GSE2706_UNSTIM_VS_8H_R848_DC_DN		CAMP_UP.V1_DN
XU_CREBBP_TARGETS_UP		BURTON_ADIPOGENESIS_PEAK_AT_2HR
GSE29618_PDC_VS_MDC_DN		VERRECCHIA_DELAYED_RESPONSE_TO_TGFB1
WIERENGA_STAT5A_TARGETS_GROUP2		SMIRNOV_RESPONSE_TO_IR_2HR_UP
REACTOME_AUTODEGRADATION_OF_CDH1_BY_CDH1_APC_C		HELLER_HDAC_TARGETS_SILENCED_BY_METHYLATION_UP
KAN_RESPONSE_TO_ARSENIC_TRIOXIDE		AFFAR_YY1_TARGETS_UP
KIM_WT1_TARGETS_8HR_UP		ZHANG_TLX_TARGETS_60HR_UP
TSENG_ADIPOGENIC_POTENTIAL_DN		SMIRNOV_RESPONSE_TO_IR_6HR_UP
MODULE_433		RAF_UP.V1_DN
UZONYI_RESPONSE_TO_LEUKOTRIENE_AND_THROMBIN		RIZ_ERYTHROID_DIFFERENTIATION_12HR
ZHANG_RESPONSE_TO_IKK_INHIBITOR_AND_TNF_UP		DAVICIONI_TARGETS_OF_PAX_FOXO1_FUSIONS_UP
TOMIDA_METASTASIS_DN		GSE24142_ADULT_VS_FETAL_DN3_THYMOCYTE_DN
GSE1460_INTRATHYMIC_T_PROGENITOR_VS_THYMIC_STROMAL_CELL_DN		ZWANG_CLASS_3_TRANSIENTLY_INDUCED_BY_EGF
GSE17974_CTRL_VS_ACT_IL4_AND_ANTI_IL12_6H_CD4_TCELL_DN		MARTORIATI_MDM4_TARGETS_NEUROEPITHELIUM_UP
CHARAFE_BREAST_CANCER_LUMINAL_VS_BASAL_DN		CROONQUIST_STROMAL_STIMULATION_UP
GSE15930_STIM_VS_STIM_AND_TRICHOSTATINA_48H_CD8_T_CELL_UP		JECHLINGER_EPITHELIAL_TO_MESENCHYMAL_TRANSITION_DN
WANG_LSD1_TARGETS_UP		KLEIN_TARGETS_OF_BCR_ABL1_FUSION
REACTOME_RESPIRATORY_ELECTRON_TRANSPORT_ATP_SYNTHESIS_BY_CHEMIOSMOTIC_COUPLING_AND_HEAT_PRODUCTION_BY_UNCOUPLING_PROTEINS_		ONGUSAHA_TP53_TARGETS
LIANG_SILENCED_BY_METHYLATION_2		NAGASHIMA_EGF_SIGNALING_UP
PAPASPYRIDONOS_UNSTABLE_ATEROSCLEROTIC_PLAQUE_UP		GSE14769_UNSTIM_VS_40MIN_LPS_BMDM_DN
MODULE_128		HADDAD_B_LYMPHOCYTE_PROGENITOR
LIU_CMYB_TARGETS_UP		GSE24142_ADULT_VS_FETAL_DN2_THYMOCYTE_DN
MODULE_2		HUMMEL_BURKITTS_LYMPHOMA_UP
RB_DN.V1_DN		ZHANG_TLX_TARGETS_DN
MCBRYAN_PUBERTAL_BREAST_5_6WK_UP		PHONG_TNF_TARGETS_UP
PID_AP1_PATHWAY		GSE22886_NAIVE_BCELL_VS_MONOCYTE_UP
LU_TUMOR_ENDOTHELIAL_MARKERS_UP		KHETCHOUMIAN_TRIM24_TARGETS_UP
SCHLOSSER_MYC_TARGETS_AND_SERUM_RESPONSE_DN		MCMURRAY_TP53_HRAS_COOPERATION_RESPONSE_DN
GSE2706_LPS_VS_R848_AND_LPS_8H_STIM_DC_DN		CAIRO_LIVER_DEVELOPMENT_UP
GSE12845_IGD_POS_VS_NEG_BLOOD_BCELL_DN		BORLAK_LIVER_CANCER_EGF_UP
ZHANG_TLX_TARGETS_DN
MODULE_38
HUANG_FOXA2_TARGETS_DN
ONDER_CDH1_TARGETS_2_UP
SCHUETZ_BREAST_CANCER_DUCTAL_INVASIVE_UP
CAIRO_LIVER_DEVELOPMENT_UP
MCBRYAN_PUBERTAL_TGFB1_TARGETS_DN
CHIARADONNA_NEOPLASTIC_TRANSFORMATION_KRAS_CDC25_DN
CONCANNON_APOPTOSIS_BY_EPOXOMICIN_UP
POS_HISTAMINE_RESPONSE_NETWORK
REACTOME_AUTODEGRADATION_OF_THE_E3_UBIQUITIN_LIGASE_COP1
BOYLAN_MULTIPLE_MYELOMA_D_CLUSTER_UP
RICKMAN_TUMOR_DIFFERENTIATED_WELL_VS_MODERATELY_DN
WANG_HCP_PROSTATE_CANCER
UEDA_CENTRAL_CLOCK
BIOCARTA_MITOCHONDRIA_PATHWAY
MULLIGAN_NTF3_SIGNALING_VIA_INSR_AND_IGF1R_UP
MODULE_6
TSENG_ADIPOGENIC_POTENTIAL_UP
MODULE_223
MCMURRAY_TP53_HRAS_COOPERATION_RESPONSE_DN
WINTER_HYPOXIA_METAGENE
SANSOM_WNT_PATHWAY_REQUIRE_MYC
HARRIS_HYPOXIA
OSWALD_HEMATOPOIETIC_STEM_CELL_IN_COLLAGEN_GEL_UP
PETROVA_PROX1_TARGETS_DN
GSE36476_CTRL_VS_TSST_ACT_16H_MEMORY_CD4_TCELL_OLD_DN
PHONG_TNF_RESPONSE_VIA_P38_PARTIAL
KEEN_RESPONSE_TO_ROSIGLITAZONE_DN
SUNG_METASTASIS_STROMA_UP
FOSTER_TOLERANT_MACROPHAGE_UP
BOSCO_ALLERGEN_INDUCED_TH2_ASSOCIATED_MODULE
KANG_GIST_WITH_PDGFRA_UP
DIRMEIER_LMP1_RESPONSE_EARLY
ENGELMANN_CANCER_PROGENITORS_UP
GSE7460_TCONV_VS_TREG_THYMUS_DN
REACTOME_P53_DEPENDENT_G1_DNA_DAMAGE_RESPONSE
HELLER_HDAC_TARGETS_SILENCED_BY_METHYLATION_UP
BURTON_ADIPOGENESIS_7
LEE_NEURAL_CREST_STEM_CELL_DN
PHONG_TNF_RESPONSE_VIA_P38_COMPLETE
TIEN_INTESTINE_PROBIOTICS_6HR_DN
GOZGIT_ESR1_TARGETS_DN
ACEVEDO_FGFR1_TARGETS_IN_PROSTATE_CANCER_MODEL_UP
GHANDHI_BYSTANDER_IRRADIATION_UP
GSE7852_LN_VS_FAT_TCONV_DN
MODULE_1
GERY_CEBP_TARGETS
WANG_SMARCE1_TARGETS_UP
GSE14769_UNSTIM_VS_120MIN_LPS_BMDM_DN
CHIARADONNA_NEOPLASTIC_TRANSFORMATION_KRAS_CDC25_UP
PENG_RAPAMYCIN_RESPONSE_DN
INGA_TP53_TARGETS
GSE39820_CTRL_VS_IL1B_IL6_IL23A_CD4_TCELL_DN
GSE1432_CTRL_VS_IFNG_6H_MICROGLIA_DN
REACTOME_REGULATION_OF_ORNITHINE_DECARBOXYLASE_ODC
ONDER_CDH1_TARGETS_2_DN
GSE39820_CTRL_VS_IL1B_IL6_CD4_TCELL_DN
MCLACHLAN_DENTAL_CARIES_DN
TARTE_PLASMA_CELL_VS_B_LYMPHOCYTE_UP
BEGUM_TARGETS_OF_PAX3_FOXO1_FUSION_DN
LTE2_UP.V1_DN
LINDSTEDT_DENDRITIC_CELL_MATURATION_A
REACTOME_APOPTOSIS
TIAN_TNF_SIGNALING_VIA_NFKB
REACTOME_CDK_MEDIATED_PHOSPHORYLATION_AND_REMOVAL_OF_CDC6
GSE36392_MAC_VS_NEUTROPHIL_IL25_TREATED_LUNG_DN
REACTOME_CROSS_PRESENTATION_OF_SOLUBLE_EXOGENOUS_ANTIGENS_ENDOSOMES
GSE14000_UNSTIM_VS_4H_LPS_DC_TRANSLATED_RNA_DN
BRUECKNER_TARGETS_OF_MIRLET7A3_UP
WAMUNYOKOLI_OVARIAN_CANCER_GRADES_1_2_UP
HUANG_DASATINIB_RESISTANCE_UP
MCLACHLAN_DENTAL_CARIES_UP
BROCKE_APOPTOSIS_REVERSED_BY_IL6
SHEPARD_CRUSH_AND_BURN_MUTANT_UP
REACTOME_ANTIGEN_PROCESSING_CROSS_PRESENTATION
CHEN_LVAD_SUPPORT_OF_FAILING_HEART_UP
GSE20715_0H_VS_24H_OZONE_TLR4_KO_LUNG_DN
CROONQUIST_STROMAL_STIMULATION_UP
GSE29618_BCELL_VS_MDC_DN
GHANDHI_DIRECT_IRRADIATION_UP
LANDIS_ERBB2_BREAST_TUMORS_324_UP
GSE7852_TREG_VS_TCONV_THYMUS_UP
REACTOME_ACTIVATION_OF_NF_KAPPAB_IN_B_CELLS
KORKOLA_EMBRYONIC_CARCINOMA_VS_SEMINOMA_UP
ELVIDGE_HYPOXIA_UP
DUTERTRE_ESTRADIOL_RESPONSE_24HR_DN
GESERICK_TERT_TARGETS_DN
REACTOME_RESPIRATORY_ELECTRON_TRANSPORT
CHEN_PDGF_TARGETS
PID_P53DOWNSTREAMPATHWAY
MCDOWELL_ACUTE_LUNG_INJURY_UP
BIOCARTA_PROTEASOME_PATHWAY
GSE24142_ADULT_VS_FETAL_EARLY_THYMIC_PROGENITOR_DN
GSE9988_LOW_LPS_VS_VEHICLE_TREATED_MONOCYTE_UP
YAO_TEMPORAL_RESPONSE_TO_PROGESTERONE_CLUSTER_11
CHIARADONNA_NEOPLASTIC_TRANSFORMATION_CDC25_UP
MODULE_5
PID_MYC_ACTIVPATHWAY
PLASARI_TGFB1_TARGETS_10HR_UP
RASHI_RESPONSE_TO_IONIZING_RADIATION_2
PELLICCIOTTA_HDAC_IN_ANTIGEN_PRESENTATION_DN
GSE24142_ADULT_VS_FETAL_DN2_THYMOCYTE_DN
MODULE_91
MISHRA_CARCINOMA_ASSOCIATED_FIBROBLAST_UP
LU_TUMOR_VASCULATURE_UP
DAVICIONI_TARGETS_OF_PAX_FOXO1_FUSIONS_UP
PASQUALUCCI_LYMPHOMA_BY_GC_STAGE_UP
REACTOME_REGULATION_OF_MRNA_STABILITY_BY_PROTEINS_THAT_BIND_AU_RICH_ELEMENTS
LIEN_BREAST_CARCINOMA_METAPLASTIC_VS_DUCTAL_UP
BRUNO_HEMATOPOIESIS
SEKI_INFLAMMATORY_RESPONSE_LPS_UP
SMIRNOV_RESPONSE_TO_IR_2HR_UP
POTTI_ETOPOSIDE_SENSITIVITY
MODULE_28
SATO_SILENCED_BY_METHYLATION_IN_PANCREATIC_CANCER_2
GSE17974_IL4_AND_ANTI_IL12_VS_UNTREATED_6H_ACT_CD4_TCELL_DN
MCBRYAN_PUBERTAL_TGFB1_TARGETS_UP
BURTON_ADIPOGENESIS_9
REACTOME_SCF_BETA_TRCP_MEDIATED_DEGRADATION_OF_EMI1
IZADPANAH_STEM_CELL_ADIPOSE_VS_BONE_UP
PASINI_SUZ12_TARGETS_DN
ICHIBA_GRAFT_VERSUS_HOST_DISEASE_35D_UP
GSE9988_LPS_VS_VEHICLE_TREATED_MONOCYTE_UP
GSE9988_ANTI_TREM1_AND_LPS_VS_VEHICLE_TREATED_MONOCYTES_UP
ELVIDGE_HYPOXIA_BY_DMOG_UP
SWEET_LUNG_CANCER_KRAS_UP
PEDERSEN_METASTASIS_BY_ERBB2_ISOFORM_1
KIM_GLIS2_TARGETS_UP
FOSTER_TOLERANT_MACROPHAGE_DN
GSE9988_ANTI_TREM1_VS_VEHICLE_TREATED_MONOCYTES_UP
GSE20715_0H_VS_48H_OZONE_TLR4_KO_LUNG_DN
GROSS_HYPOXIA_VIA_ELK3_DN
AIGNER_ZEB1_TARGETS
REN_ALVEOLAR_RHABDOMYOSARCOMA_DN
WINZEN_DEGRADED_VIA_KHSRP
NEMETH_INFLAMMATORY_RESPONSE_LPS_UP
DURAND_STROMA_MAX_UP
KEGG_PROTEASOME
REACTOME_VIF_MEDIATED_DEGRADATION_OF_APOBEC3G
KEGG_P53_SIGNALING_PATHWAY
GSE14769_UNSTIM_VS_80MIN_LPS_BMDM_DN
REACTOME_SIGNALING_BY_WNT
PID_FRA_PATHWAY
GSE14769_UNSTIM_VS_40MIN_LPS_BMDM_DN
BRUECKNER_TARGETS_OF_MIRLET7A3_DN
BORLAK_LIVER_CANCER_EGF_UP
RAF_UP.V1_DN
NAGASHIMA_EGF_SIGNALING_UP
GSE9988_ANTI_TREM1_AND_LPS_VS_CTRL_TREATED_MONOCYTES_UP
ZWANG_CLASS_3_TRANSIENTLY_INDUCED_BY_EGF
MODULE_342
YAO_TEMPORAL_RESPONSE_TO_PROGESTERONE_CLUSTER_8
REACTOME_ER_PHAGOSOME_PATHWAY
SARTIPY_NORMAL_AT_INSULIN_RESISTANCE_UP
REACTOME_DESTABILIZATION_OF_MRNA_BY_AUF1_HNRNP_D0
BURTON_ADIPOGENESIS_PEAK_AT_2HR
ICHIBA_GRAFT_VERSUS_HOST_DISEASE_D7_UP
PHONG_TNF_TARGETS_UP
EGFR_UP.V1_UP
KHETCHOUMIAN_TRIM24_TARGETS_UP
GSE9988_ANTI_TREM1_VS_CTRL_TREATED_MONOCYTES_UP
GSE14769_UNSTIM_VS_60MIN_LPS_BMDM_DN
KIM_WT1_TARGETS_UP
PETROVA_ENDOTHELIUM_LYMPHATIC_VS_BLOOD_DN
HUMMERICH_SKIN_CANCER_PROGRESSION_UP
HESS_TARGETS_OF_HOXA9_AND_MEIS1_DN
MCBRYAN_PUBERTAL_BREAST_4_5WK_UP
BOYLAN_MULTIPLE_MYELOMA_PCA3_UP
LI_INDUCED_T_TO_NATURAL_KILLER_UP
HENDRICKS_SMARCA4_TARGETS_UP
MARTORIATI_MDM4_TARGETS_FETAL_LIVER_UP
WU_CELL_MIGRATION
WOO_LIVER_CANCER_RECURRENCE_UP
GALINDO_IMMUNE_RESPONSE_TO_ENTEROTOXIN
SHETH_LIVER_CANCER_VS_TXNIP_LOSS_PAM3
YAO_TEMPORAL_RESPONSE_TO_PROGESTERONE_CLUSTER_14
KARLSSON_TGFB1_TARGETS_UP
MARTORIATI_MDM4_TARGETS_NEUROEPITHELIUM_UP
ALTEMEIER_RESPONSE_TO_LPS_WITH_MECHANICAL_VENTILATION
